# Supplementary material for: A Cas-BCAR3 co-regulatory circuit controls lamellipodia dynamics
Source: eLife journal article supplement (doi:10.7554/elife.67078), 2021-06-25
Supplement: supp [file elife-67078-supp-v1.zip]

Figure 2 – figure supplement 1

Rb  
BCAR3  
(800nm)

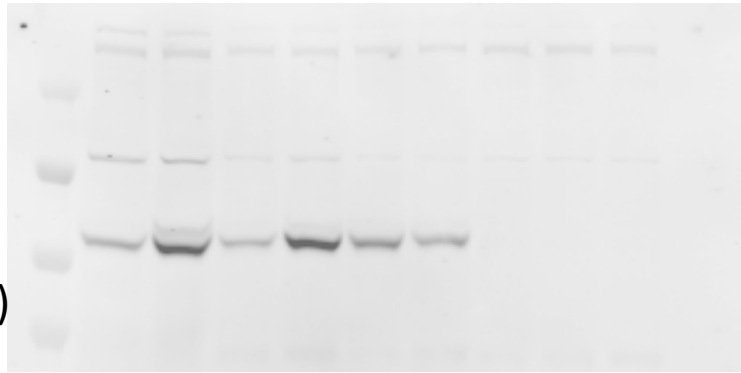

Rb  
Cas  
(800nm)

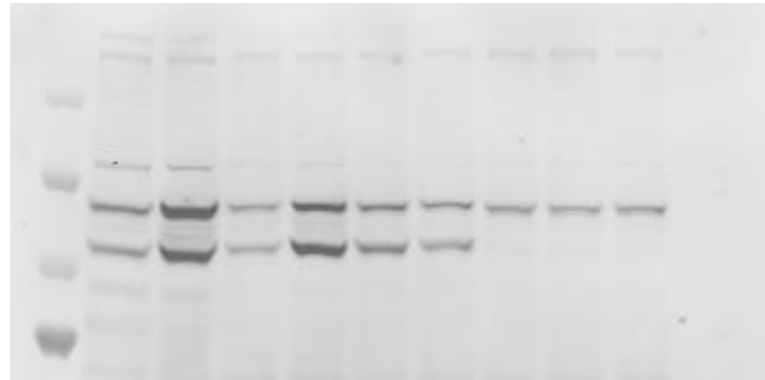

Ms  
vinculin  
(700nm)

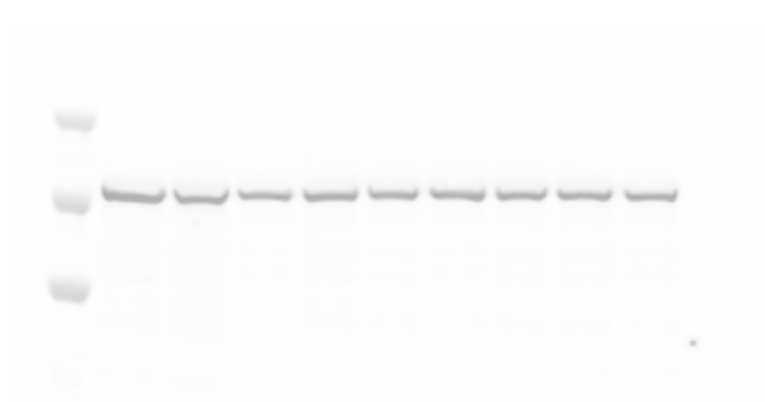

Blot was probed first with Rb BCAR3  
and Ms vinculin, followed by Cas.  
Order of the lanes is the same as the  
figure. Note BCAR3 band in Cas blot
