# Supplementary material for: A Cas-BCAR3 co-regulatory circuit controls lamellipodia dynamics
Source: eLife journal article supplement (doi:10.7554/elife.67078), 2021-06-25
Supplement: supp [file elife-67078-supp-v1.zip]

Figure 8 – figure supplement 3

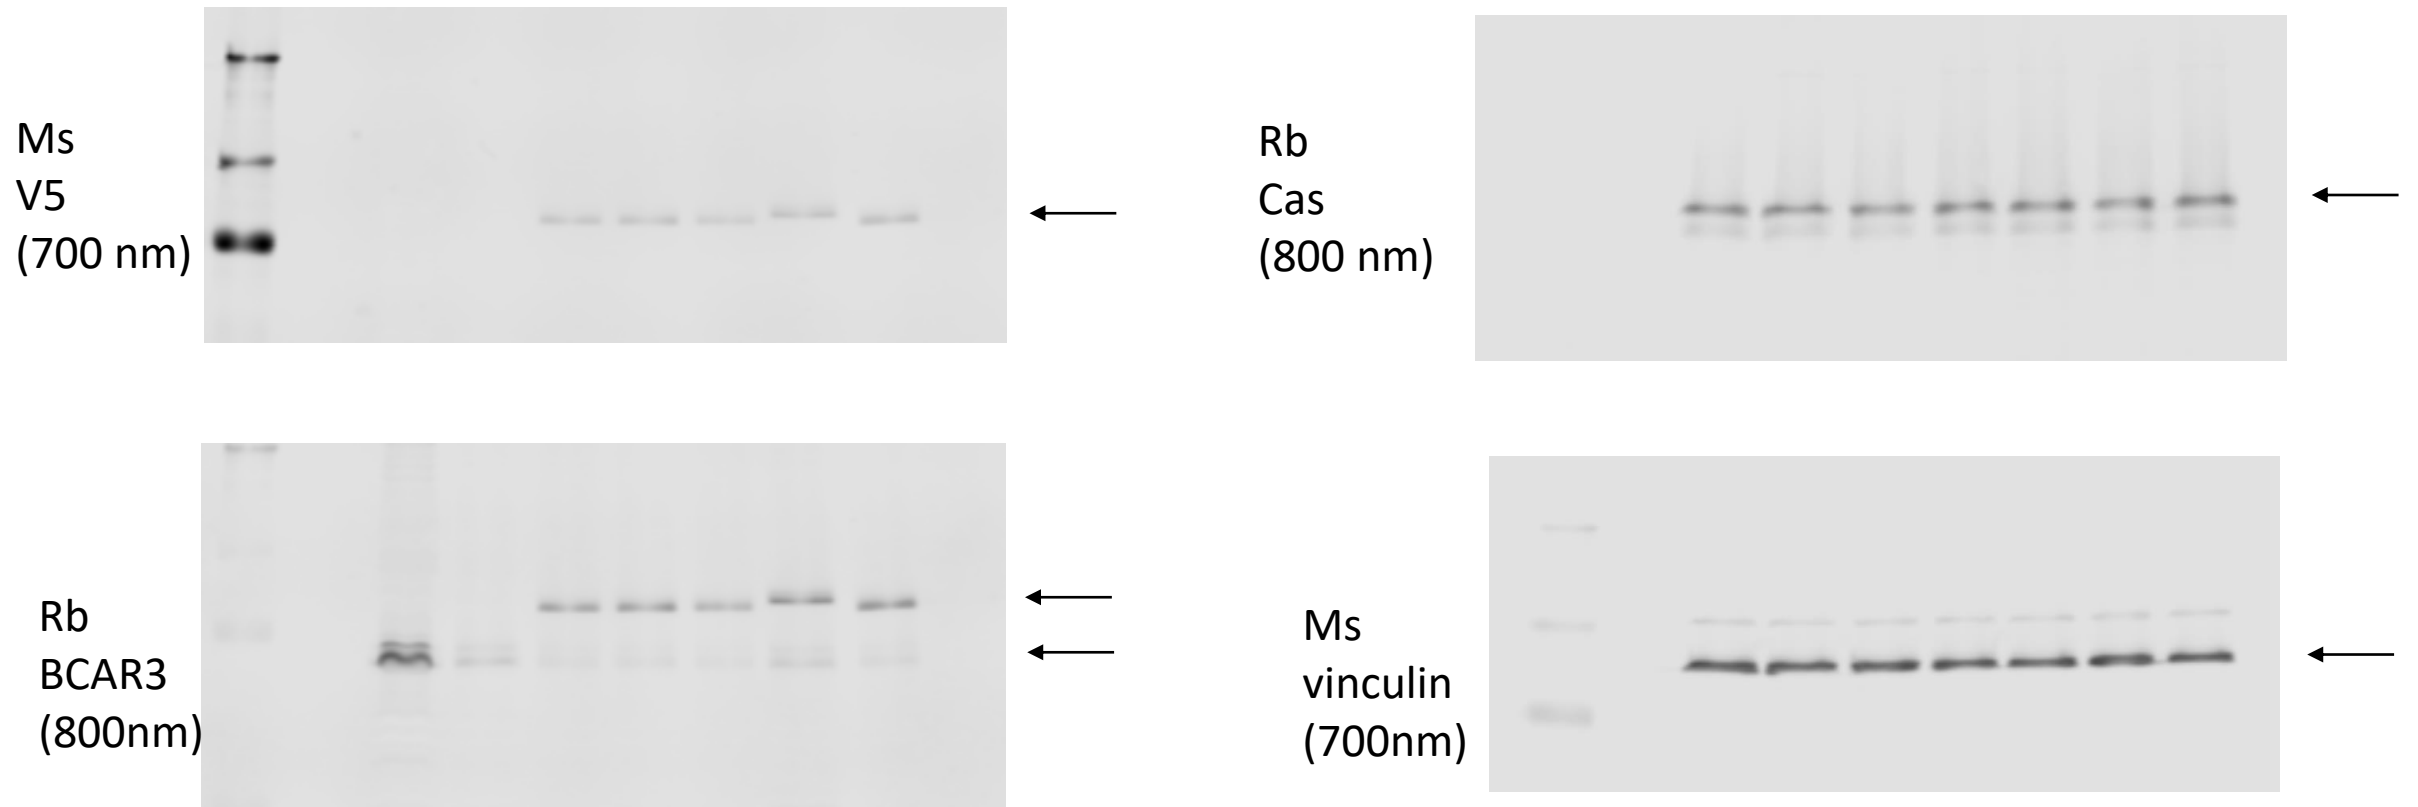

Duplicate gels were run on the same samples. One was probed with Rb BCAR3 and Ms V5 and one with Rb Cas and Ms vinculin. Order of the lanes is the same as the figure.
