# Supplementary material for: A Cas-BCAR3 co-regulatory circuit controls lamellipodia dynamics
Source: eLife journal article supplement (doi:10.7554/elife.67078), 2021-06-25
Supplement: supp [file elife-67078-supp-v1.zip]

Figure 1c

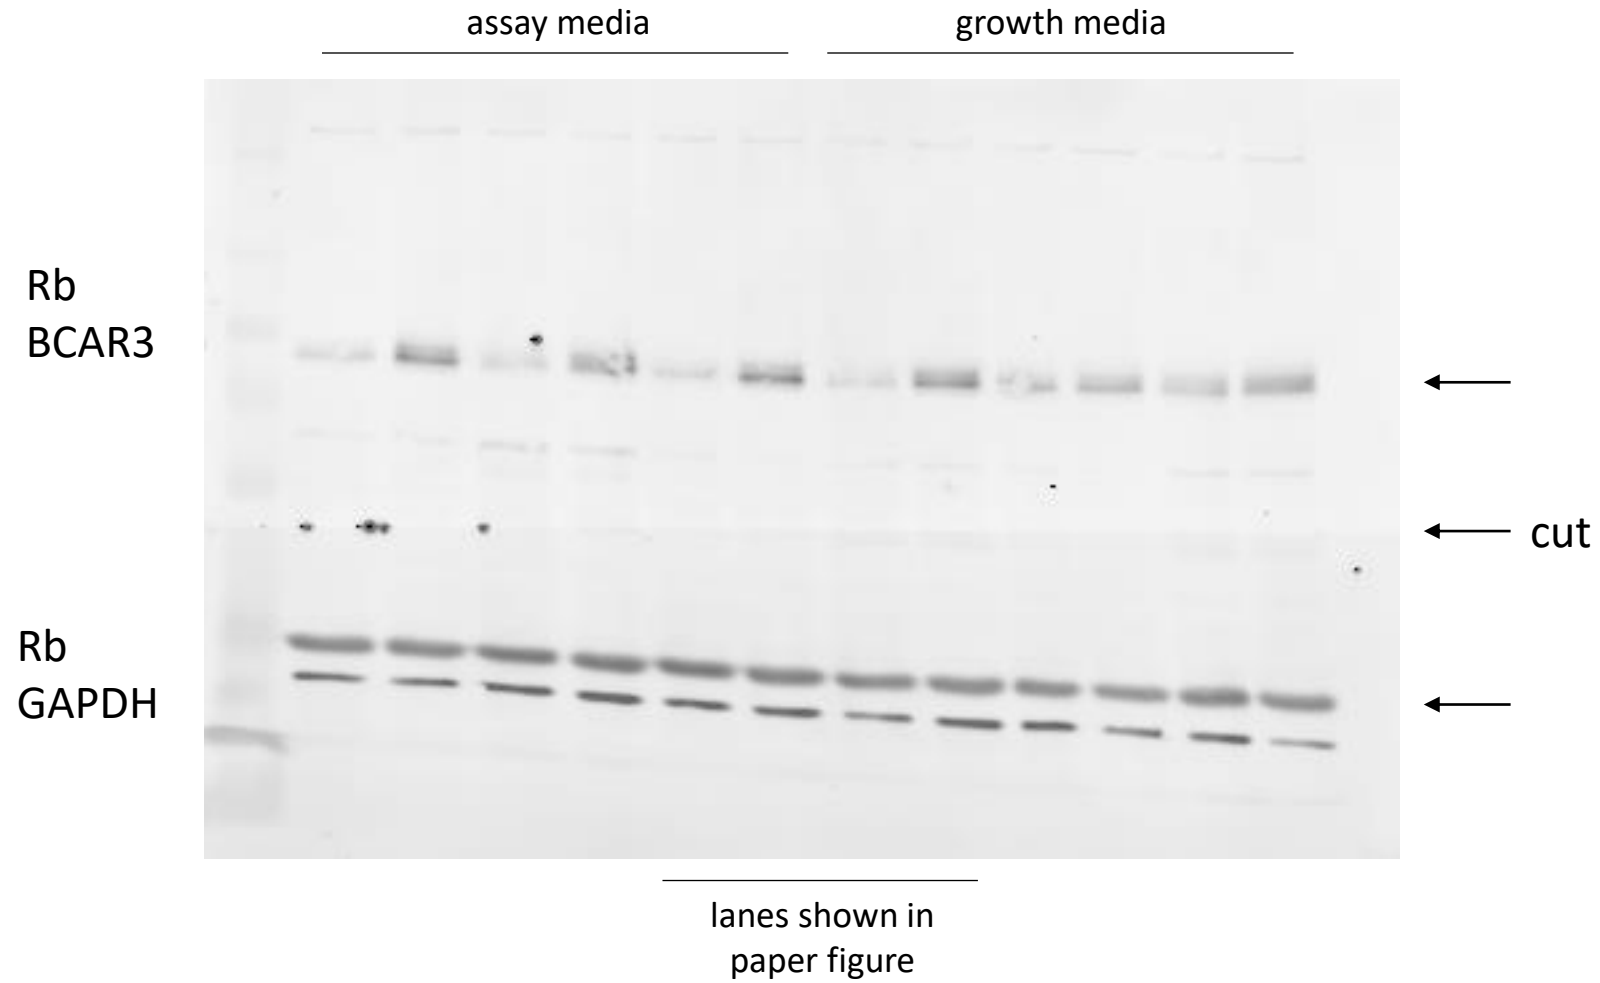

One blot was cut and probed separately for BCAR3 and GAPDH. Cropped out lanes are biological replicates

Figure 1d

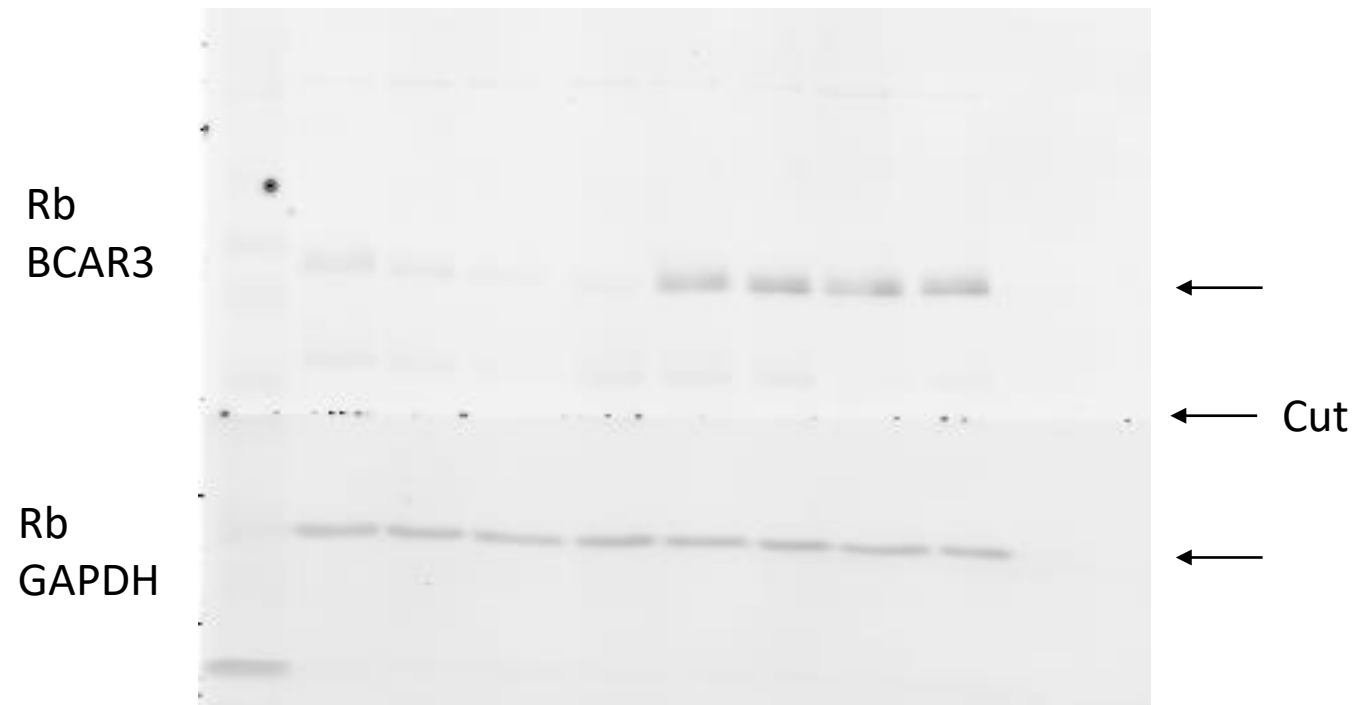

One blot was cut and probed separately for BCAR3 and GAPDH. Order of the lanes is the same as the figure.
