# Supplementary material for: A Cas-BCAR3 co-regulatory circuit controls lamellipodia dynamics
Source: eLife journal article supplement (doi:10.7554/elife.67078), 2021-06-25
Supplement: supp [file elife-67078-supp-v1.zip]

Figure 2a

Order of the lanes is the same as the figure.  
Two gels were run, one for Rb BCAR3 and Ms  
vinculin and one for Rb Cul5

Cropped out lanes were biological replicates

Rb  
BCAR3  
(800nm)

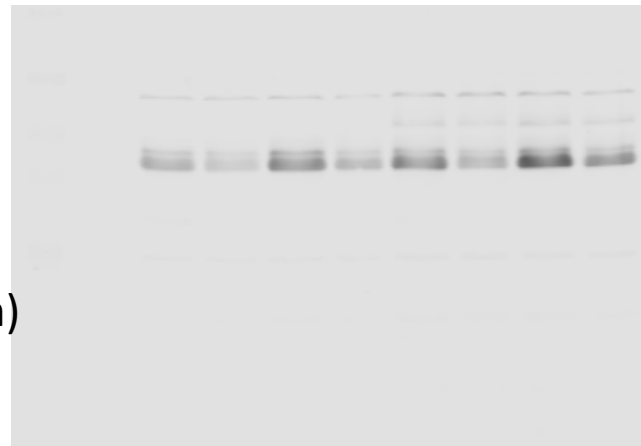

Rb  
Cul5  
(800nm)

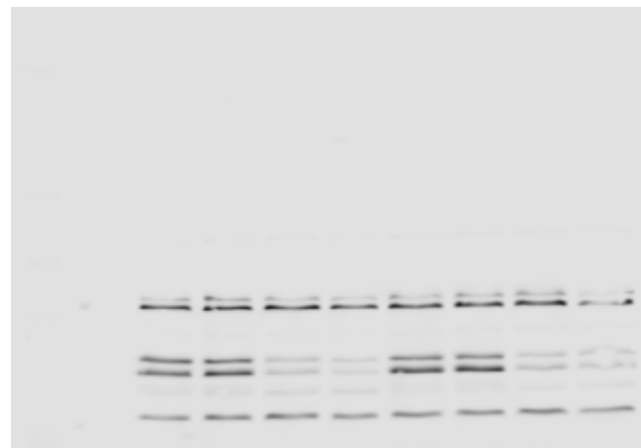

Ms  
vinculin  
(700nm)

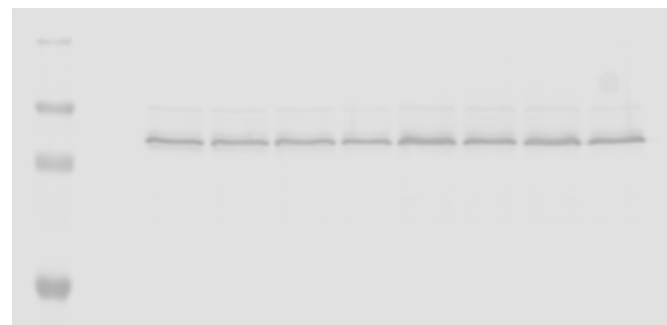

lanes shown in  
paper figure
