# Supplementary material for: A Cas-BCAR3 co-regulatory circuit controls lamellipodia dynamics
Source: eLife journal article supplement (doi:10.7554/elife.67078), 2021-06-25
Supplement: supp [file elife-67078-supp-v1.zip]

Figure 5 – figure supplement 1

Rb  
Cas  
(800nm)

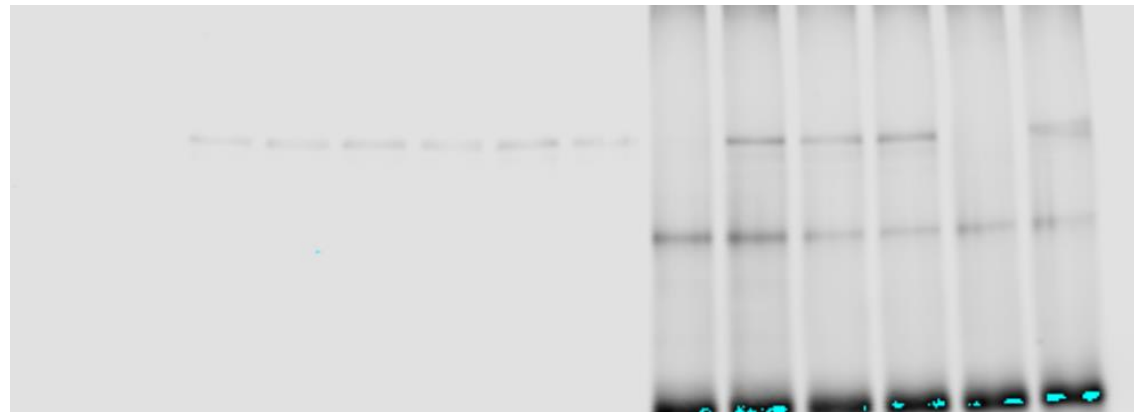

Ms  
V5  
(700nm)

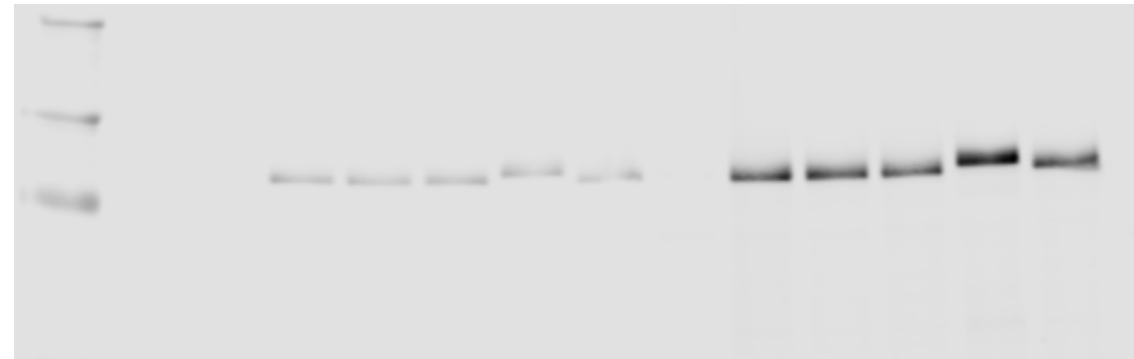

Ms  
vinculin  
(700nm)

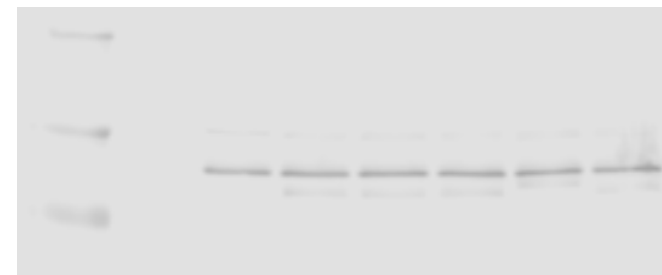

Blot was probed first with Cas and V5, followed by vinculin. Vinculin signal is so strong that Ms V5 cannot be seen in the lysate lanes. The order of the lanes is the same as the figure.
