# Supplementary material for: A Cas-BCAR3 co-regulatory circuit controls lamellipodia dynamics
Source: eLife journal article supplement (doi:10.7554/elife.67078), 2021-06-25
Supplement: supp [file elife-67078-supp-v1.zip]

Figure 4a

Rb  
FLAG  
(800nm)

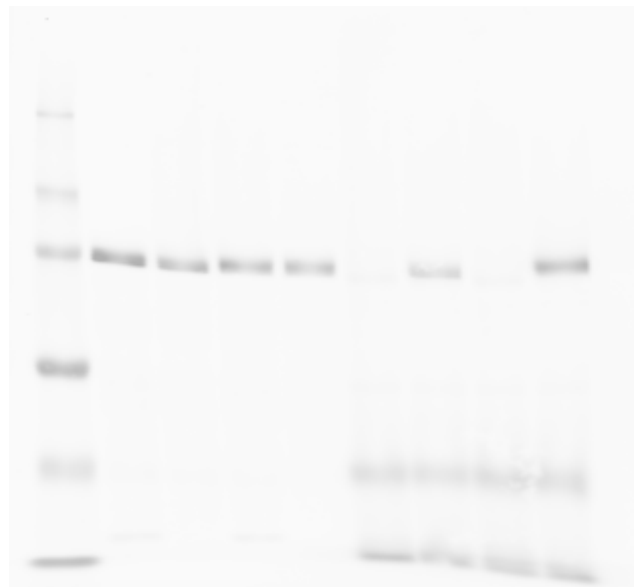

Rb  
GAPDH

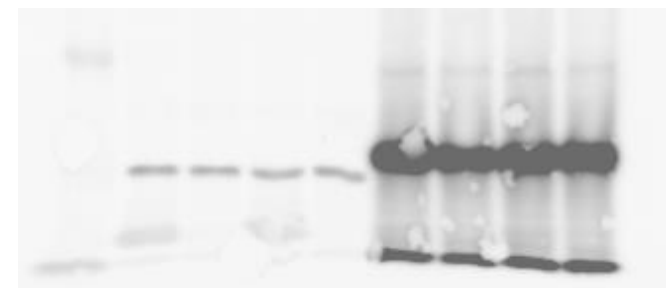

Ms  
T7  
(700nm)

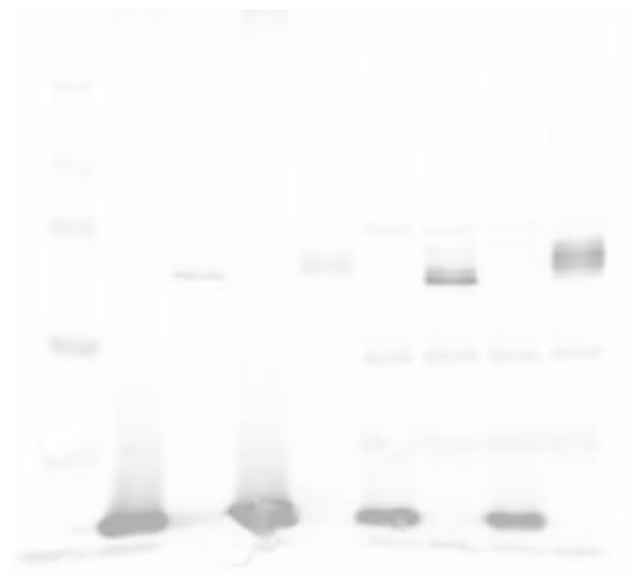

Order of the lanes is the same as the figure.

Figure 4b

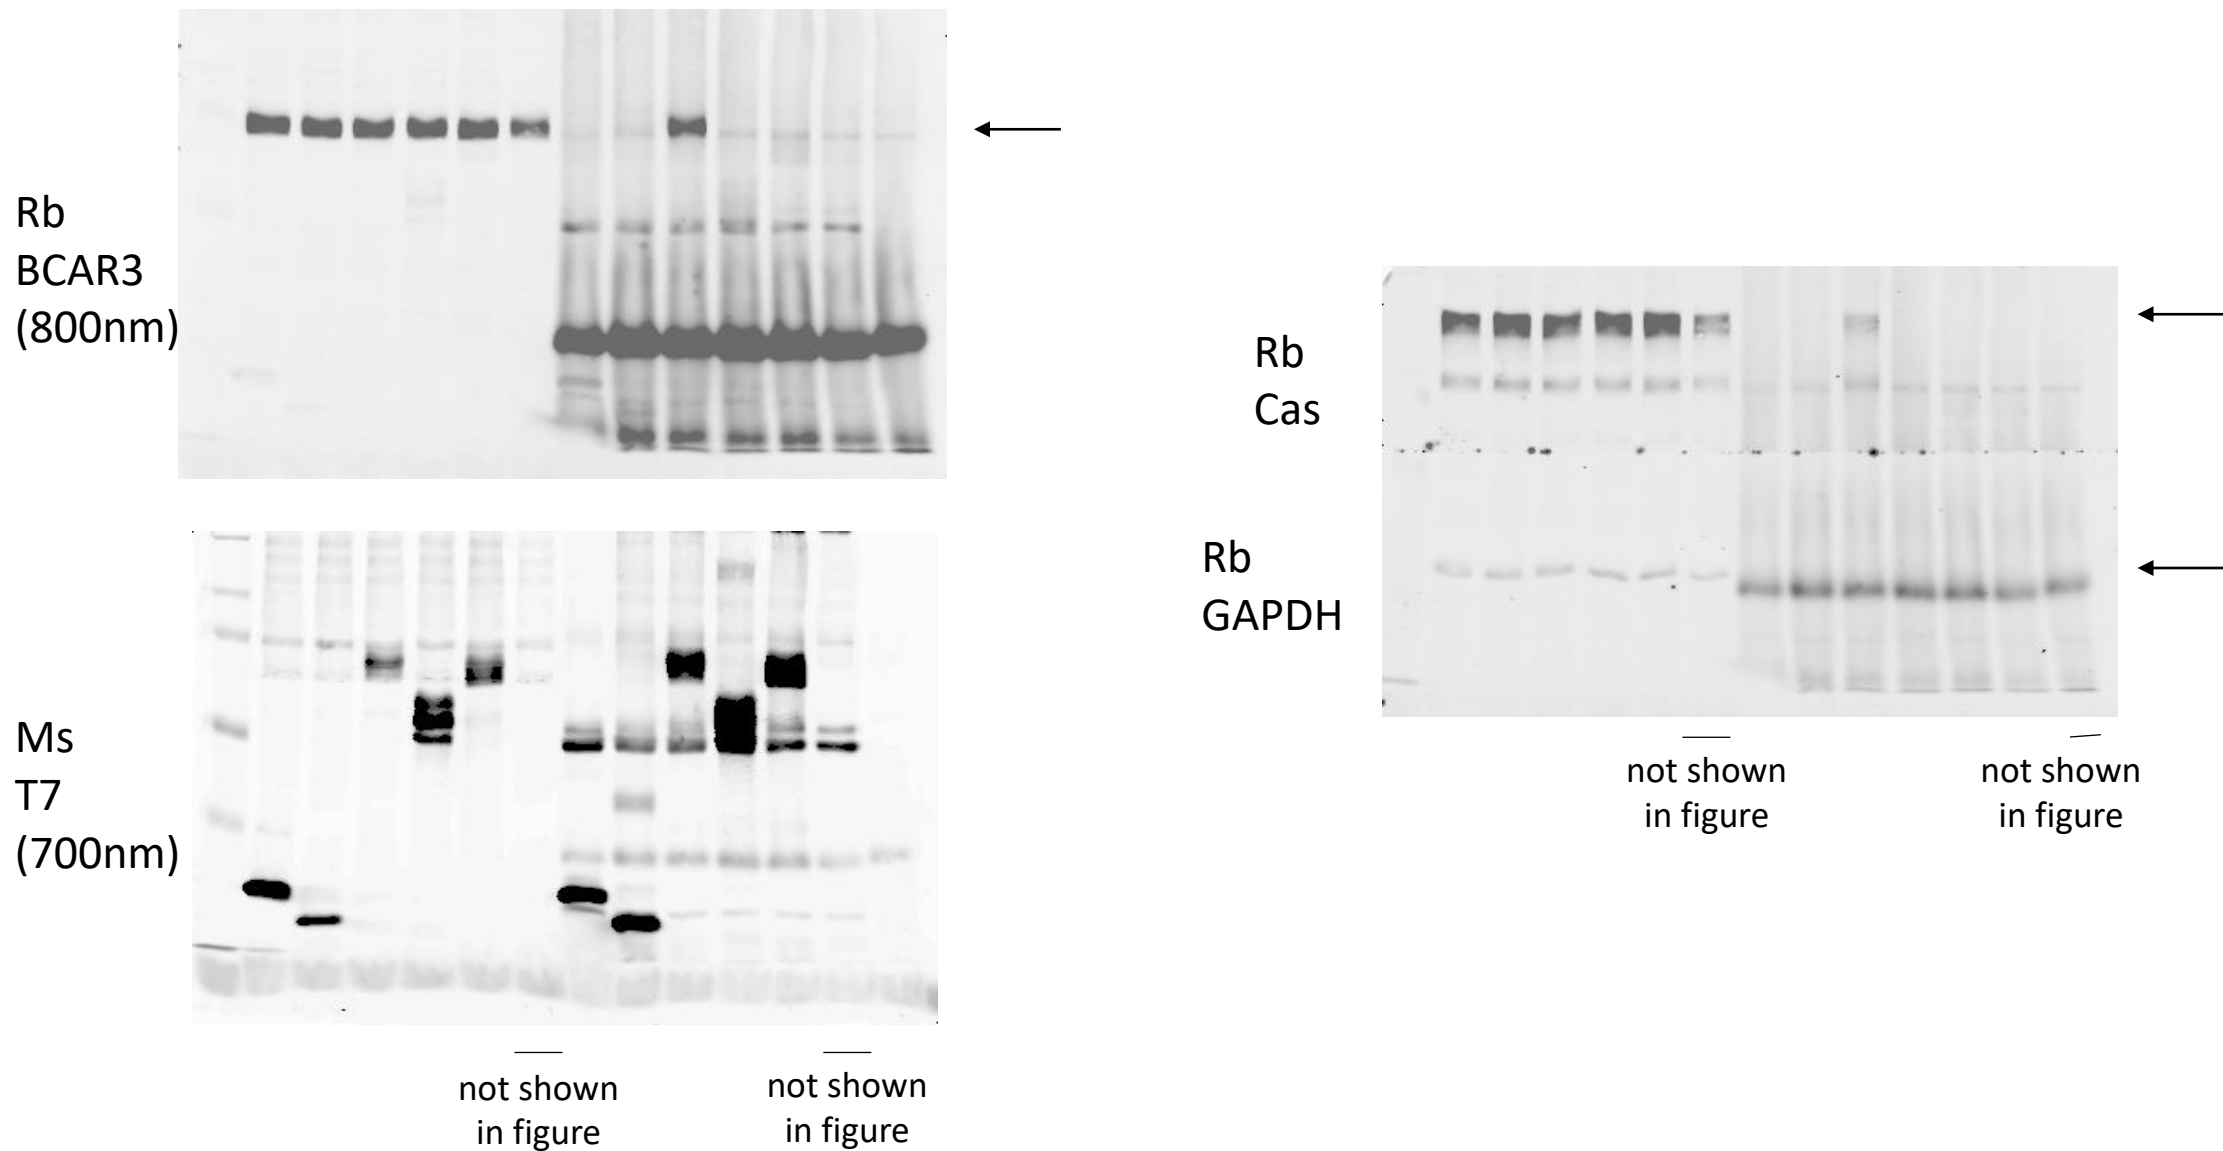

Blot was probed first with BCAR3 and T7, followed by Cas and GAPDH. The final lane of the lysate and IP show a SOCS6 mutant that is not shown in this figure in the paper. Otherwise, the order of the lanes is the same as the figure.

Figure 4d

Ms T7 (700nm)

Rb V5 (800nm)

GAPDH

IP

lysate

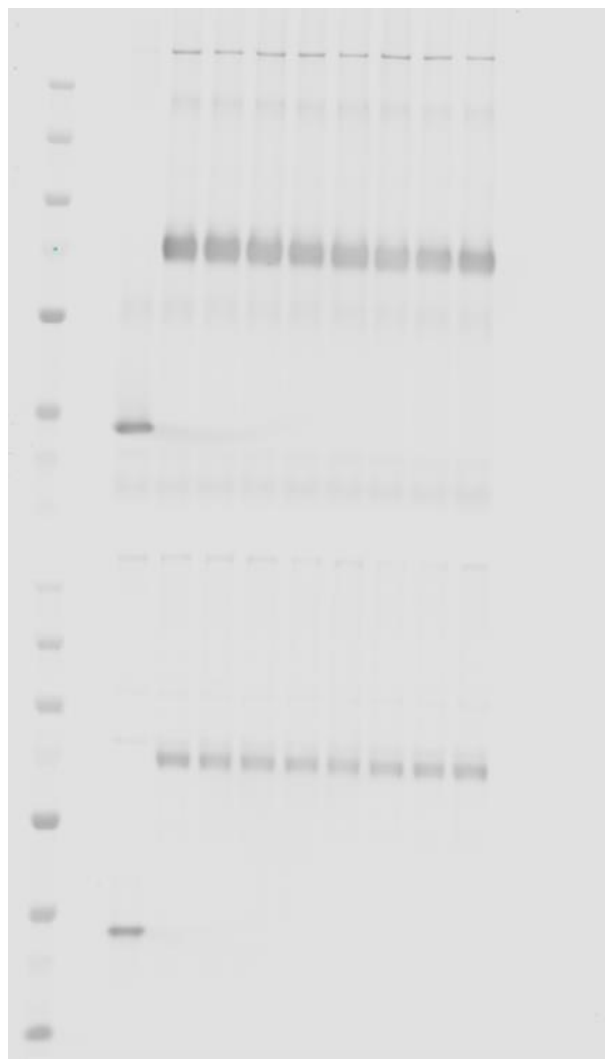

not shown  
in figure

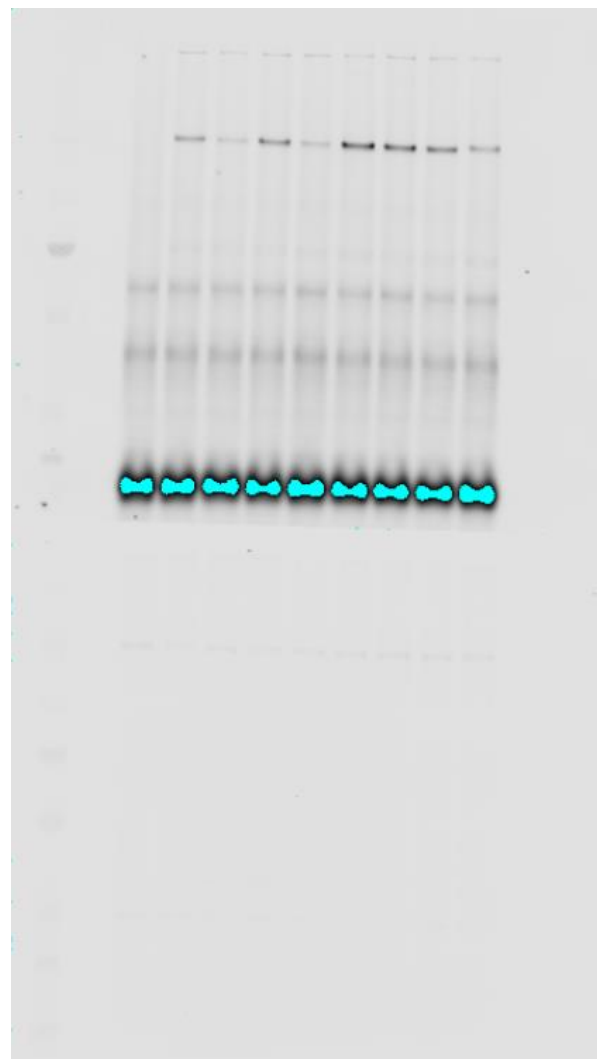

not shown  
in figure

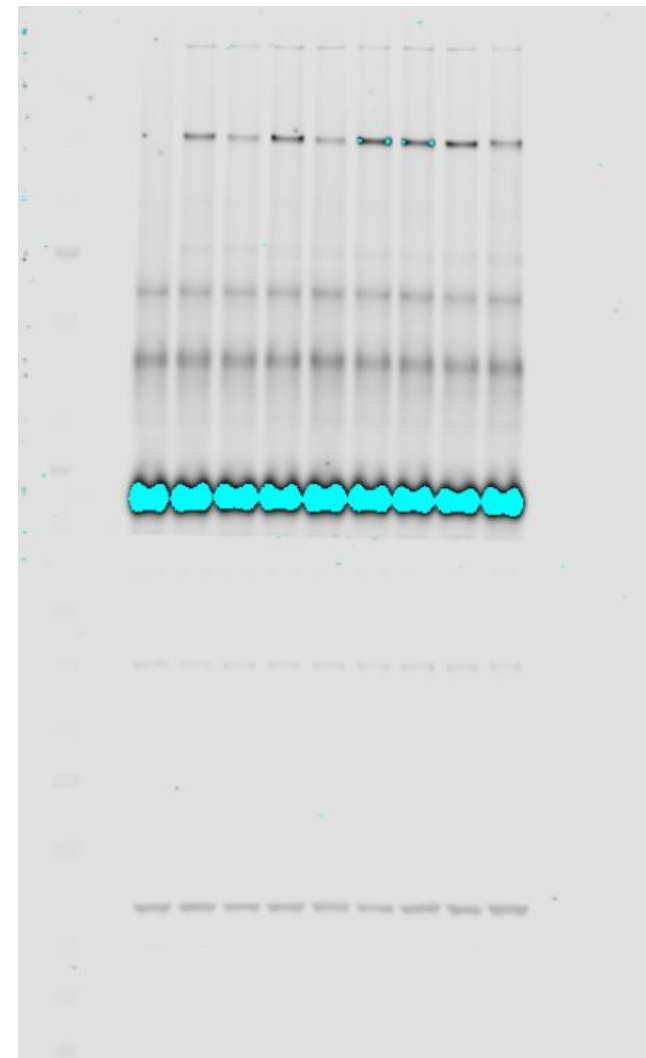

not shown  
in figure

Two gels were run, one for IPs and one for lysates. Blot was probed first with T7 and V5, followed by GAPDH. The final lane of the lysate and IP show a BCAR3 mutant that is not shown in this figure in the paper. Otherwise, order of the lanes is the same as the figure.

Figure 4e

Ms  
T7  
(700nm)

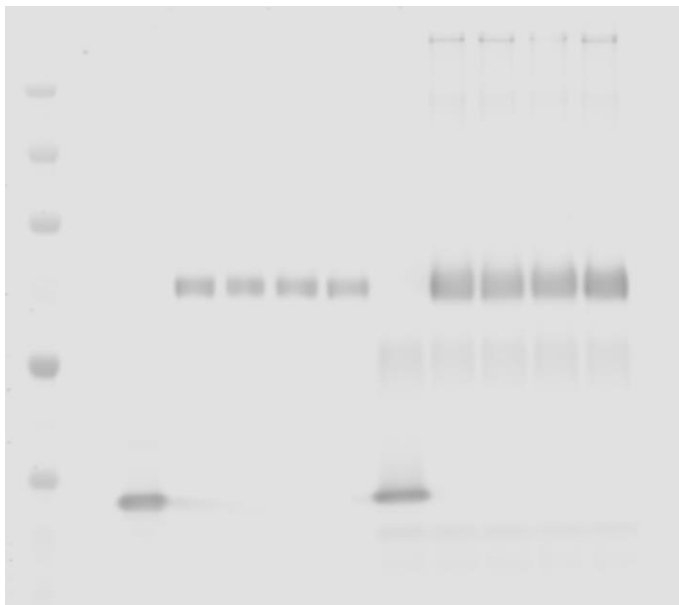

Rb  
V5  
(800nm)

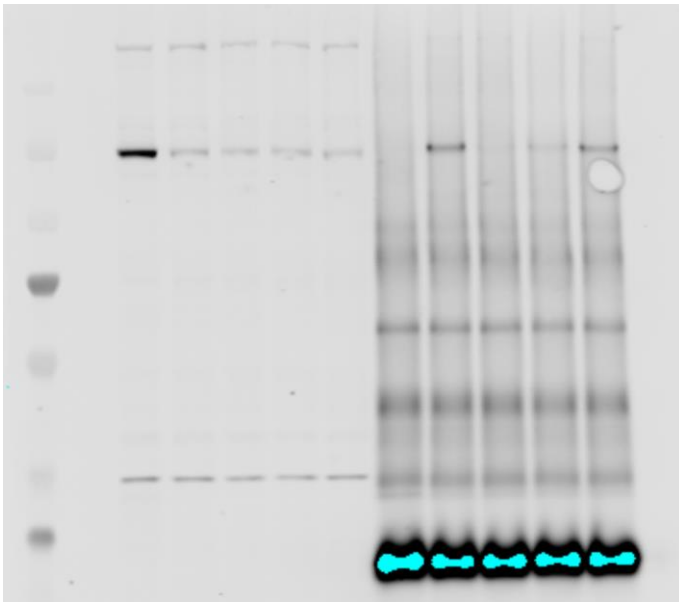

GAPDH

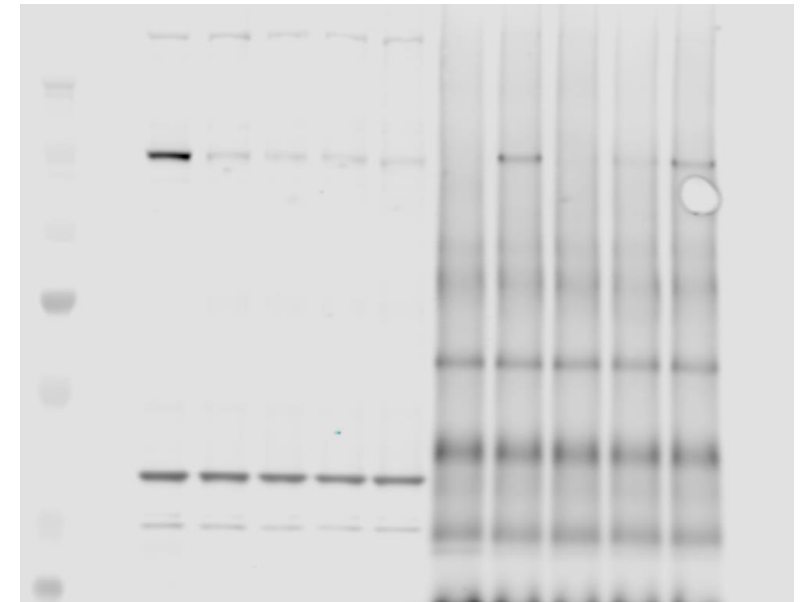

Blot was probed first with T7 and V5, followed by GAPDH. Order of the lanes is the same as the figure.
