# Supplementary material for: A Cas-BCAR3 co-regulatory circuit controls lamellipodia dynamics
Source: eLife journal article supplement (doi:10.7554/elife.67078), 2021-06-25
Supplement: supp [file elife-67078-supp-v1.zip]

Figure 7a

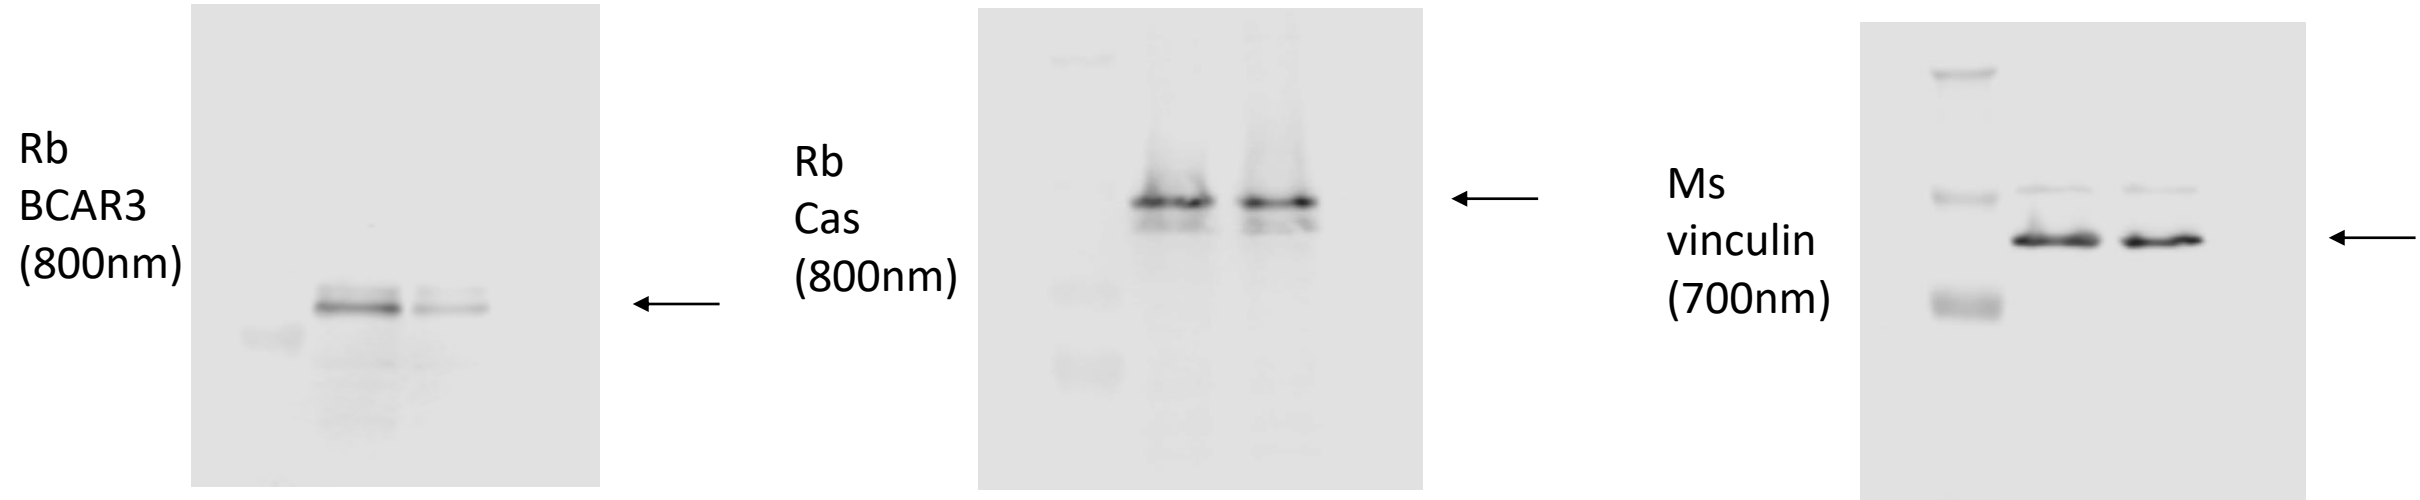

Duplicate lanes were run on the same gel and the blot cut to separate lanes that were probed with Rb BCAR3 or with Rb Cas and Ms vinculin. Order of the lanes is the same as the figure.

Figure 7b

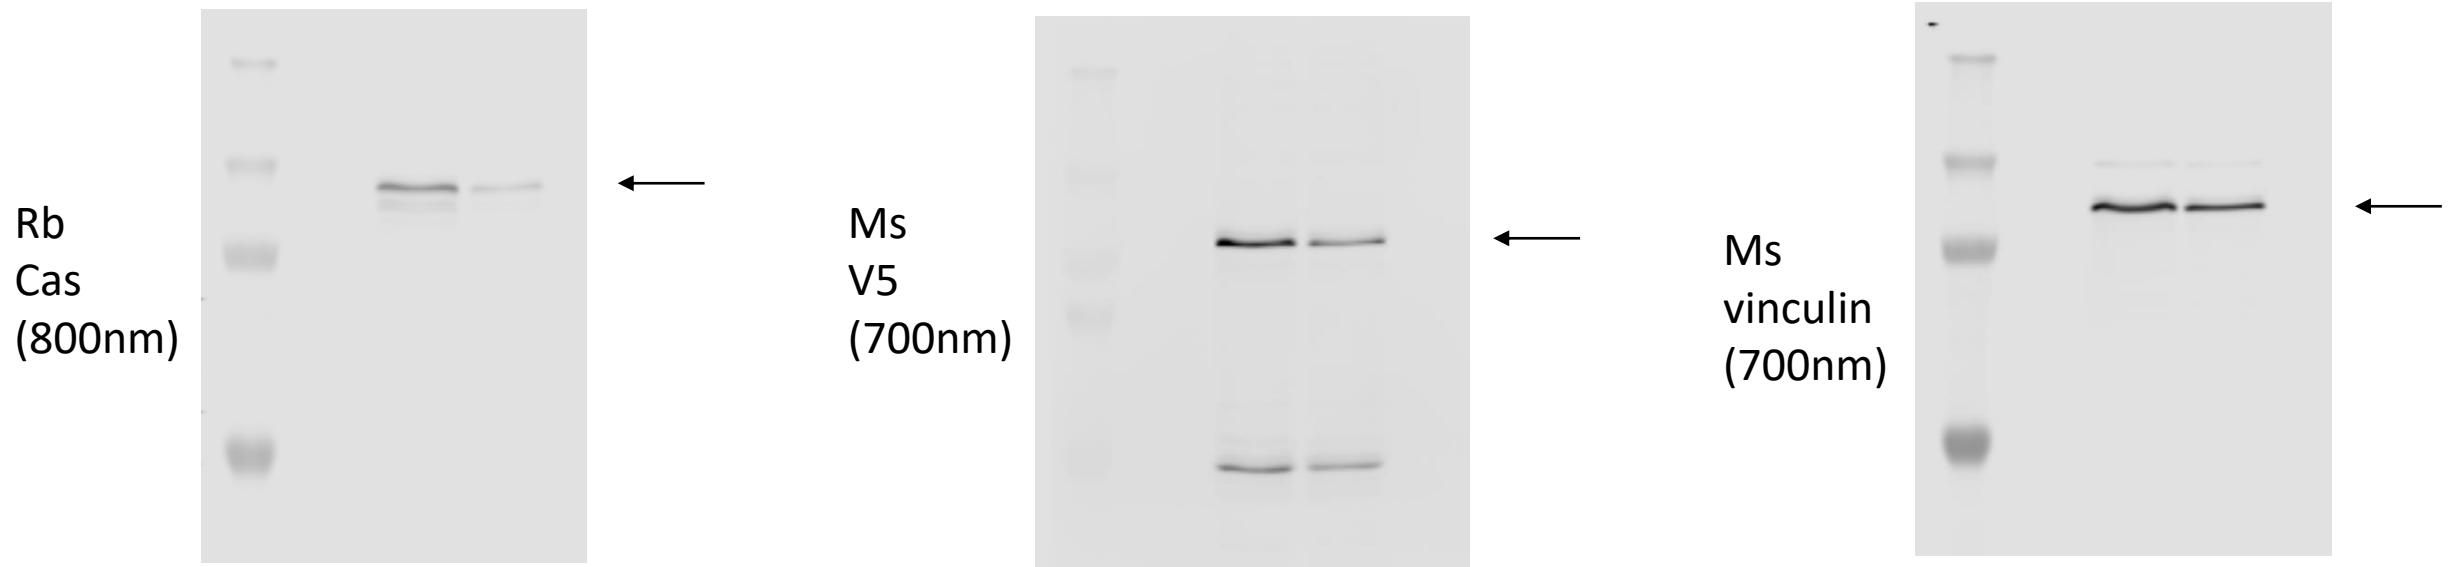

Duplicate lanes were run on the same gel and the blot cut to separate lanes that were probed with Rb Cas and Ms vinculin or with Ms V5. Order of the lanes is the same as the figure.
