# Supplementary material for: A Cas-BCAR3 co-regulatory circuit controls lamellipodia dynamics
Source: eLife journal article supplement (doi:10.7554/elife.67078), 2021-06-25
Supplement: supp [file elife-67078-supp-v1.zip]

Figure 3a  
(part)

Rb  
BCAR3  
(800nm)

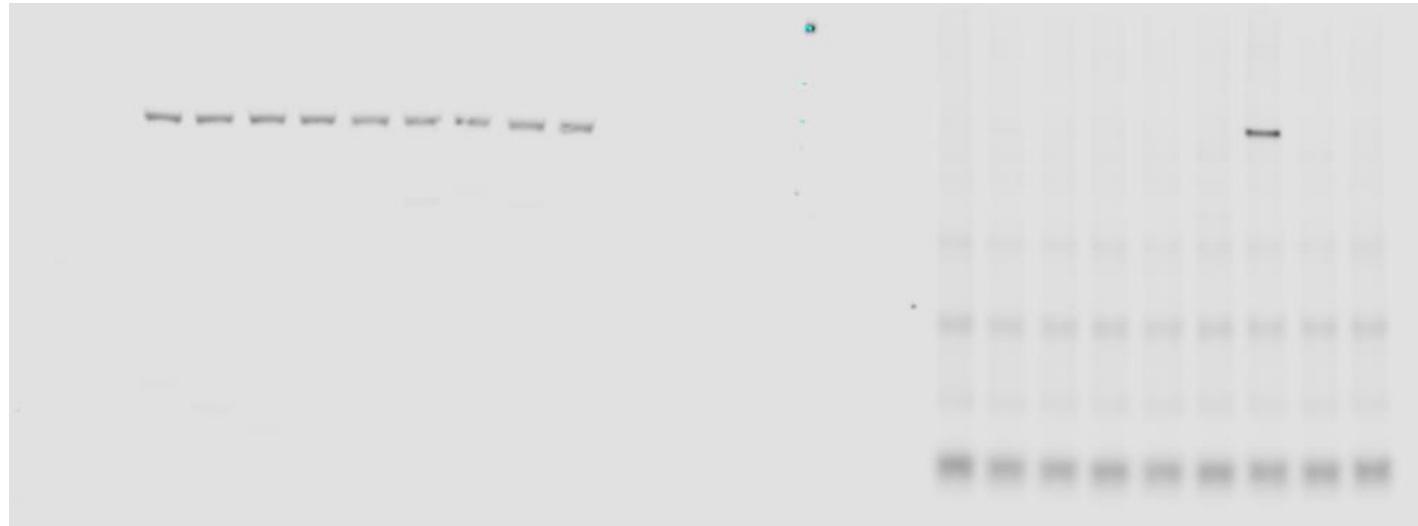

Ms  
T7  
(700nm)

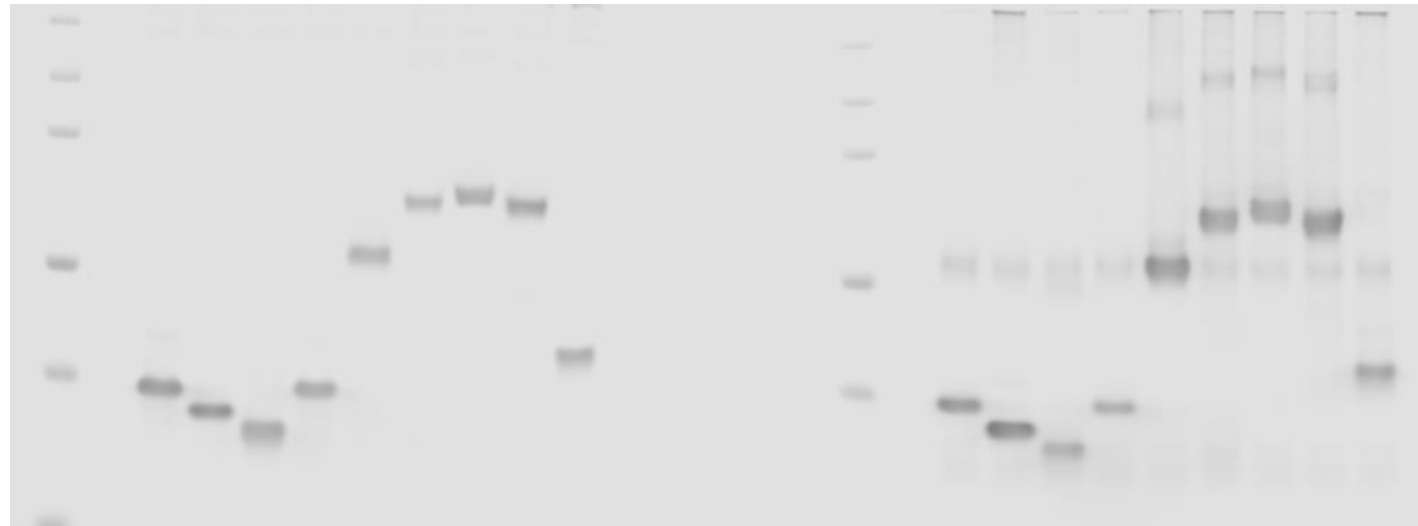

Two gels were run, blotted, probed and scanned at the same time. Lefthand blot shows lysates, righthand blot shows IPs. Each blot was probed first with Rb BCAR3 and Ms T7, followed by Rb Cas and Rb GAPDH. Order of the lanes is the same as the figure.

Figure 3a - continued

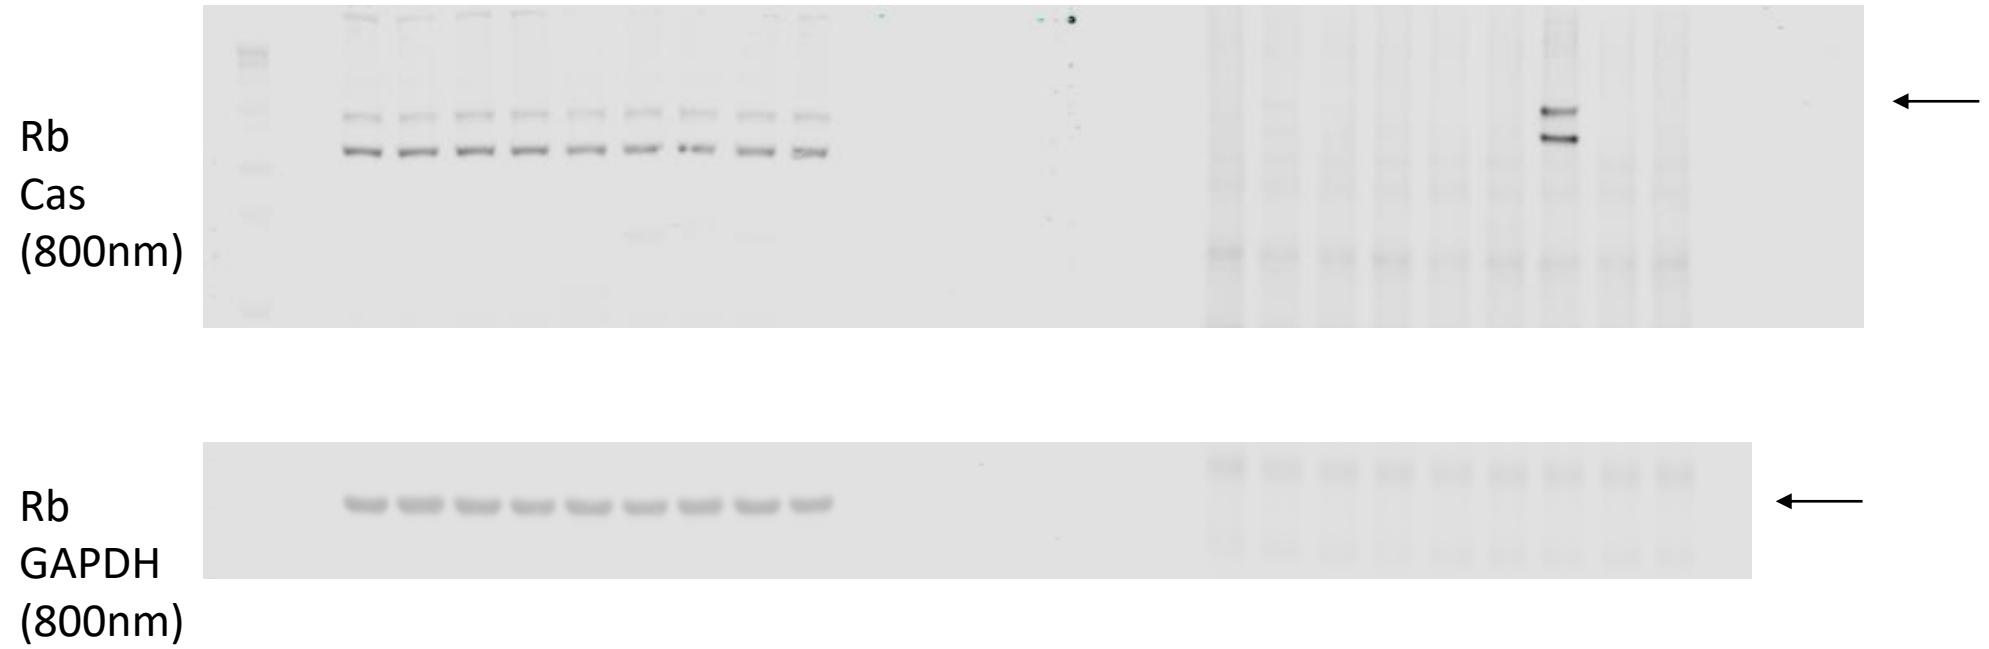

see previous legend...

The upper band in the Cas blot is Cas and the lower band is residual BCAR3

Figure 3b

Rb  
BCAR3

Rb  
GAPDH

Rb  
Cas

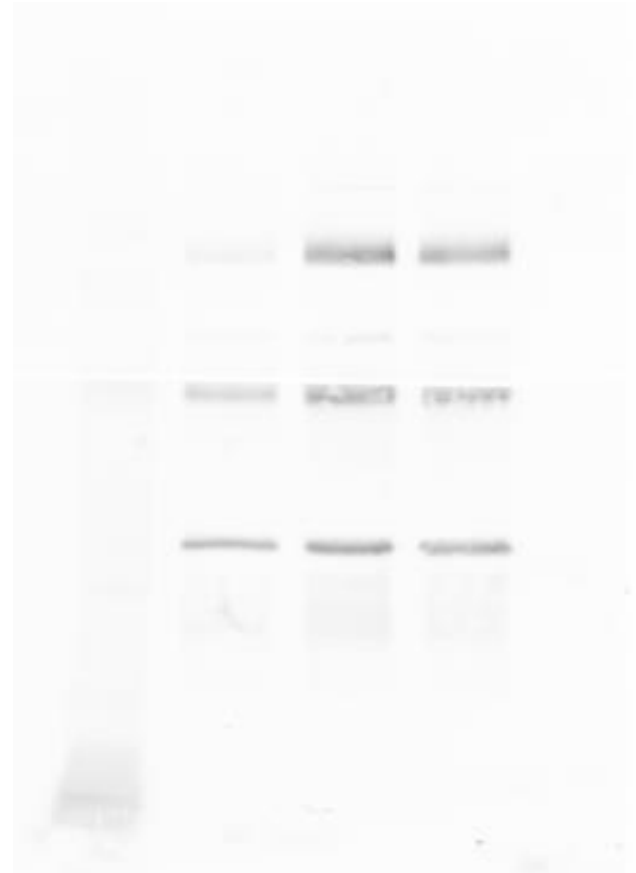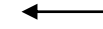

← Cut

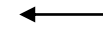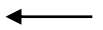

One blot was cut into two strips and probed for BCAR3 and GAPDH separately. The top strip was re-probed for Cas. In this experiment, the BCAR3 blot was cut above the BCAR3 band before probing with Cas antibody  
Order of the lanes is the same as the figure.

Figure 3c

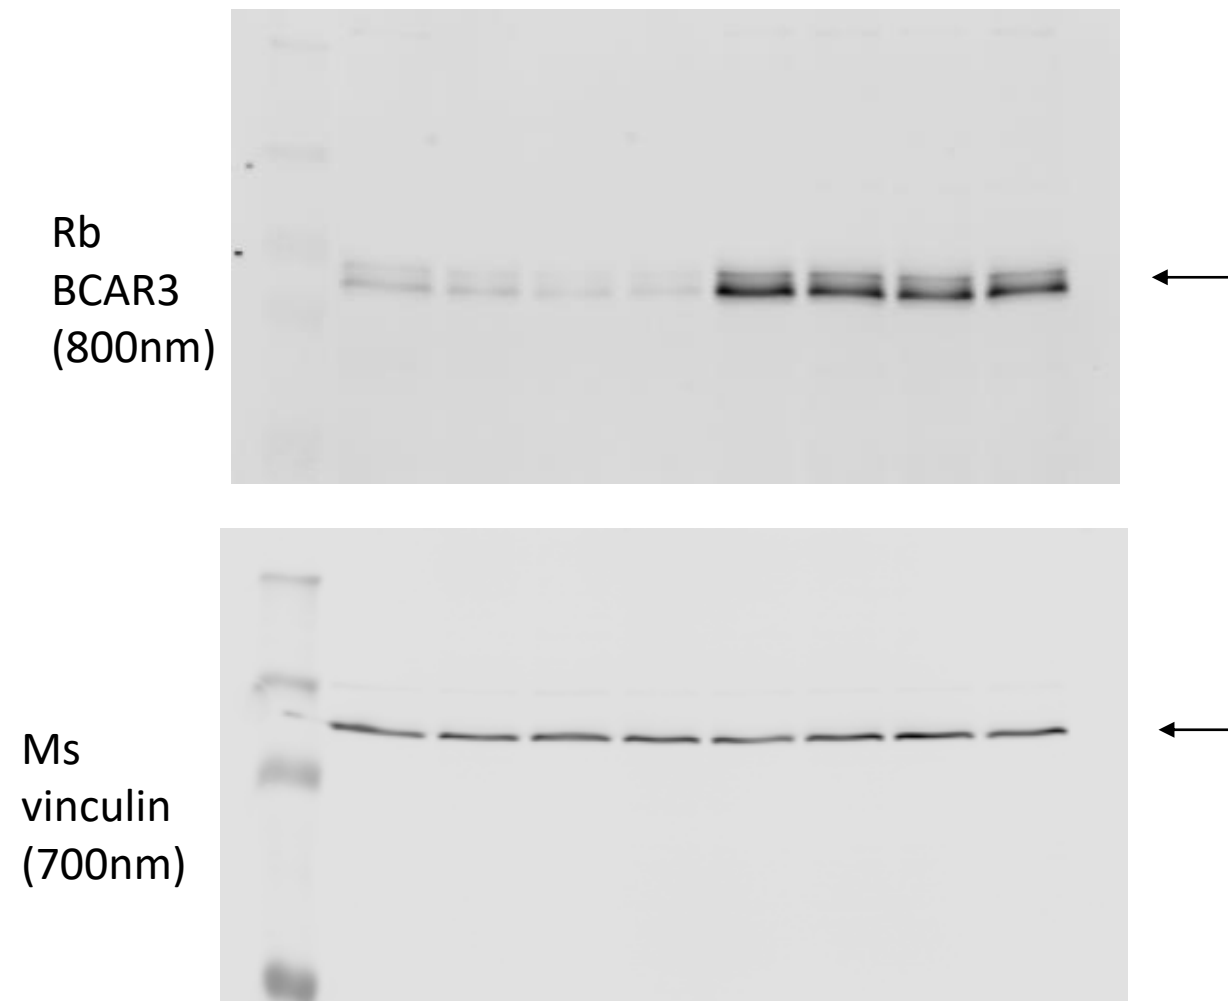

Order of the lanes is the same as the figure.

Figure 3e – left panel

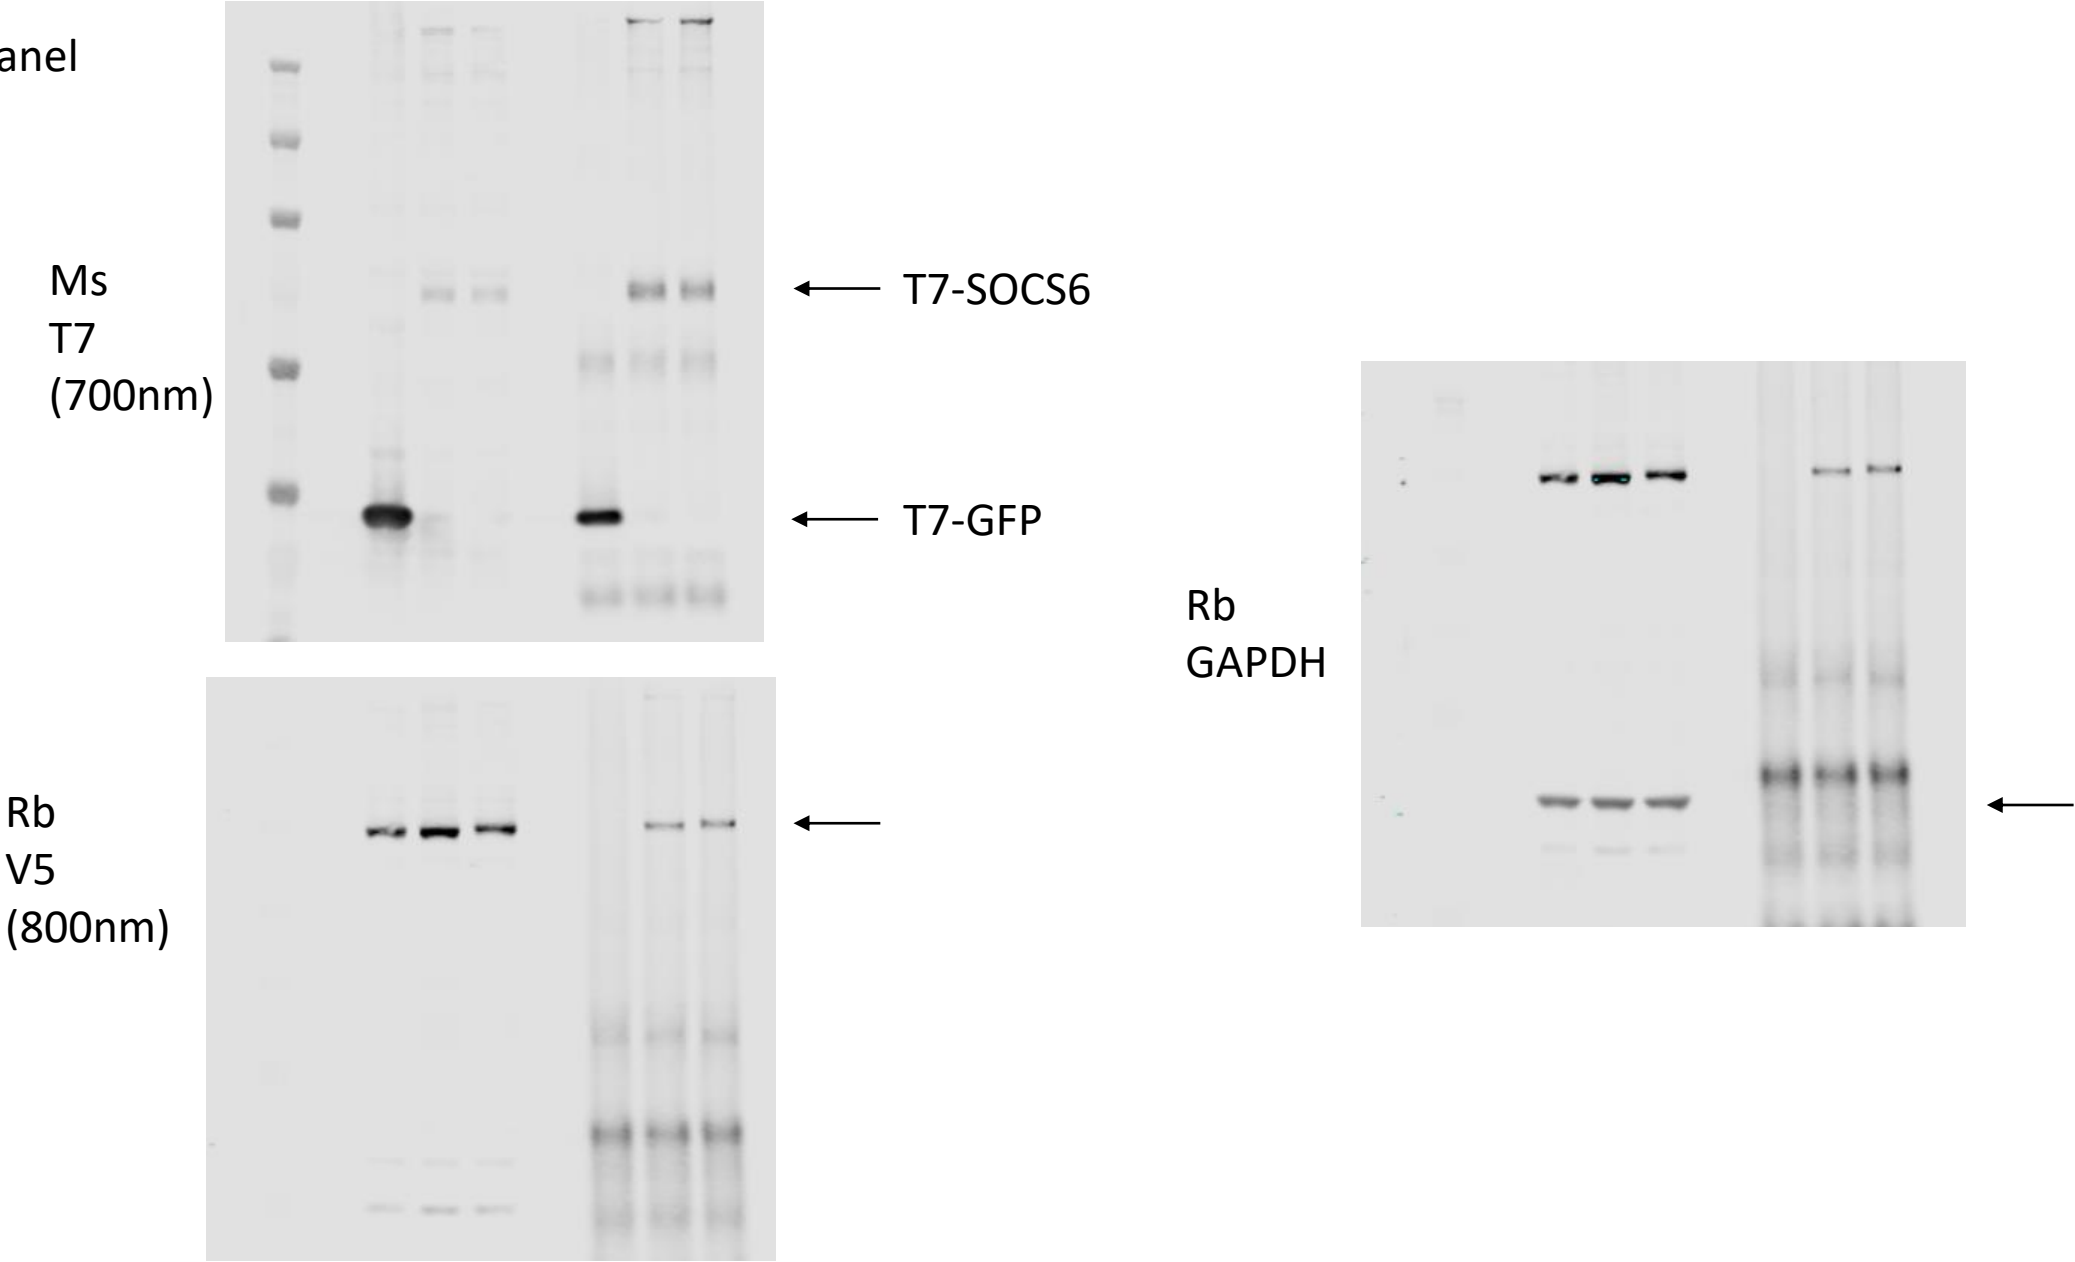

Blot was probed first with Ms T7 and Rb V5, followed by Rb GAPDH. Order of the lanes is the same as the figure.

Figure 3e – right panel

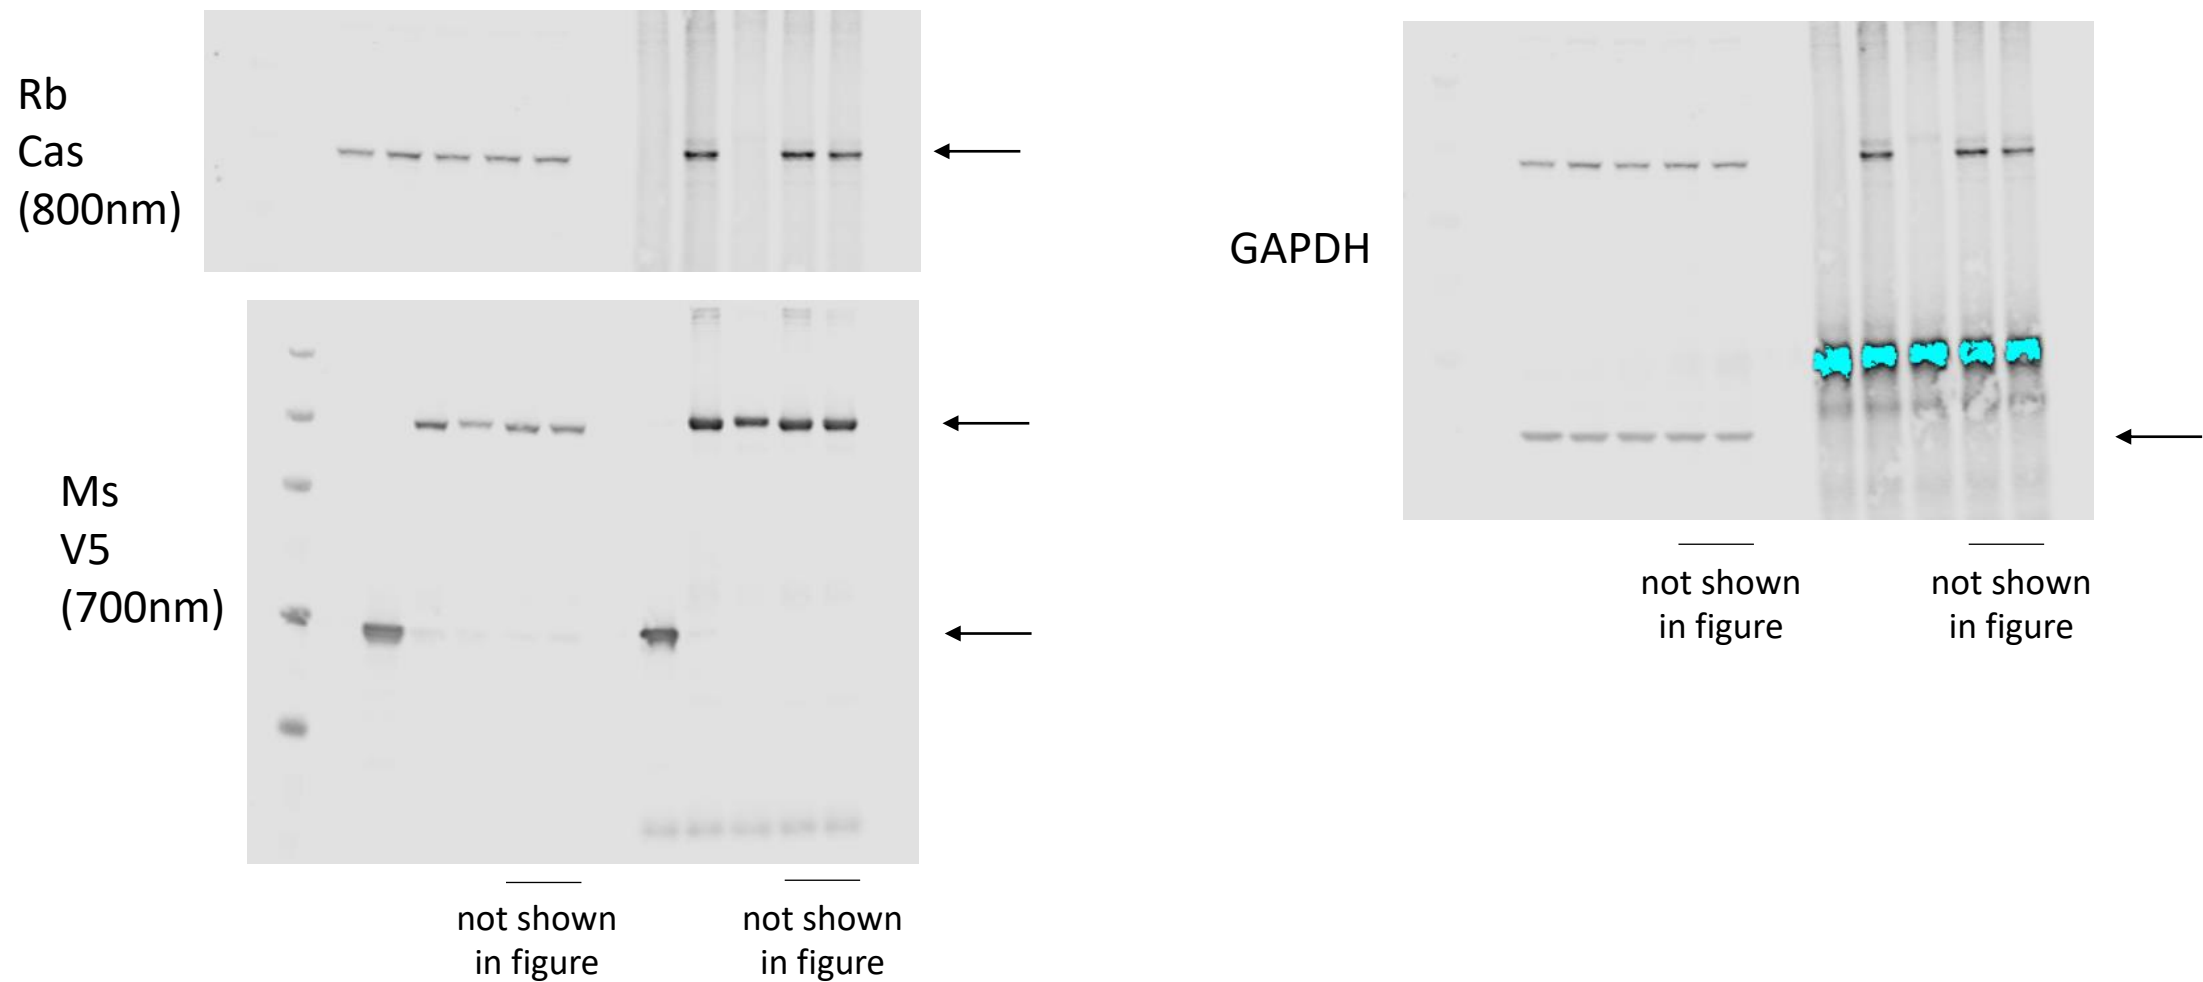

Blot was probed first with Rb Cas and Ms V5, followed by Rb GAPDH. The final two lanes of the lysate and IP show BCAR3 mutants that are not shown in this panel of the figure in the paper. Otherwise, the order of the lanes is the same as the figure.

Figure 3f

Ms  
T7  
(700nm)

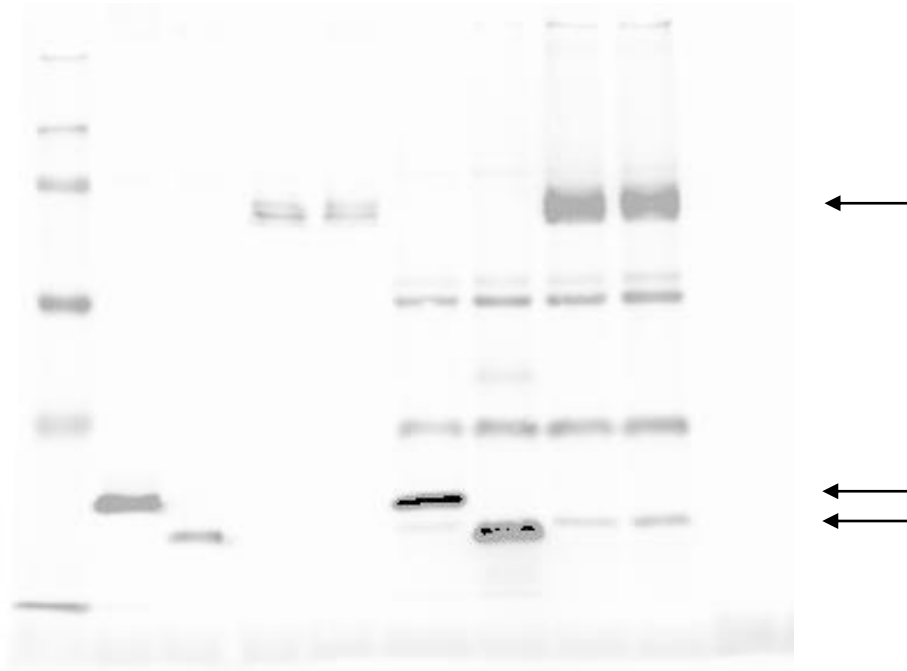

Rb  
Cas  
(800nm)

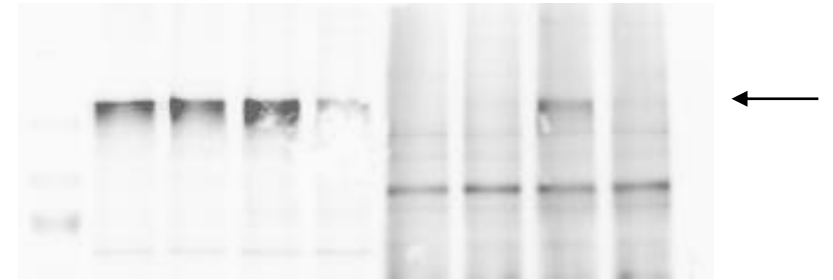

Rb  
FLAG  
(ECL)

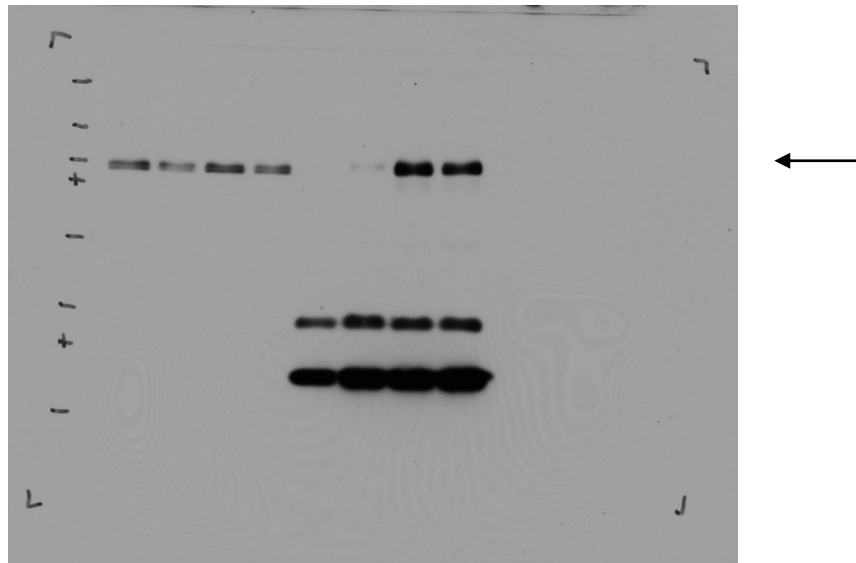

Rb  
GAPDH

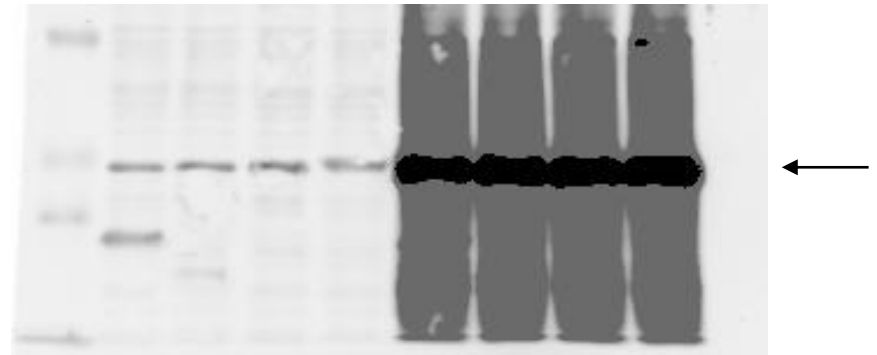

Order of the lanes is the same as the figure.
